# Supplementary material for: lncRNA MELTF-AS1 facilitates osteosarcoma metastasis by modulating MMP14 expression
Source: PubMed Central journal article supplement (PMC8526484; doi:10.1016/j.omtn.2021.08.022), 2021-08-26
Supplement: mmc1.pdf [file mmc1.pdf]

OMTN, Volume 26

## **Supplemental information**

### **lncRNA MELTF-AS1 facilitates osteosarcoma metastasis by modulating MMP14 expression**

**Lei Ding, Taiyuan Liu, Yuan Qu, Zhichen Kang, Lixin Guo, Haina Zhang, Junjie Jiang, Fuling Qu, Wanbao Ge, and Shanyong Zhang**

## Supplemental Information

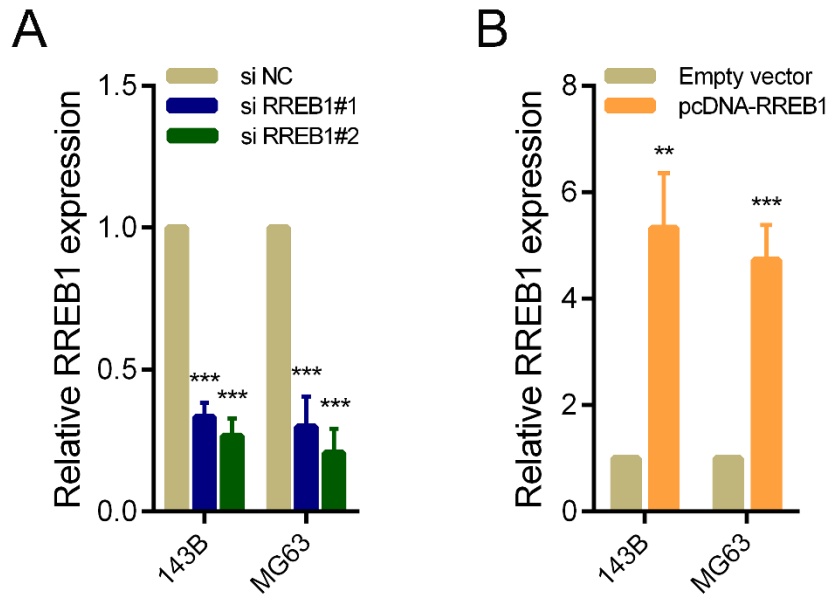

**Figure S1.** (A) QPCR analysis of RREB1 expression after knockdown of RREB1 in osteosarcoma cells. (B) QPCR analysis of RREB1 expression after overexpressing RREB1 in osteosarcoma cells. \*\*P < 0.01 and \*\*\*P < 0.001.

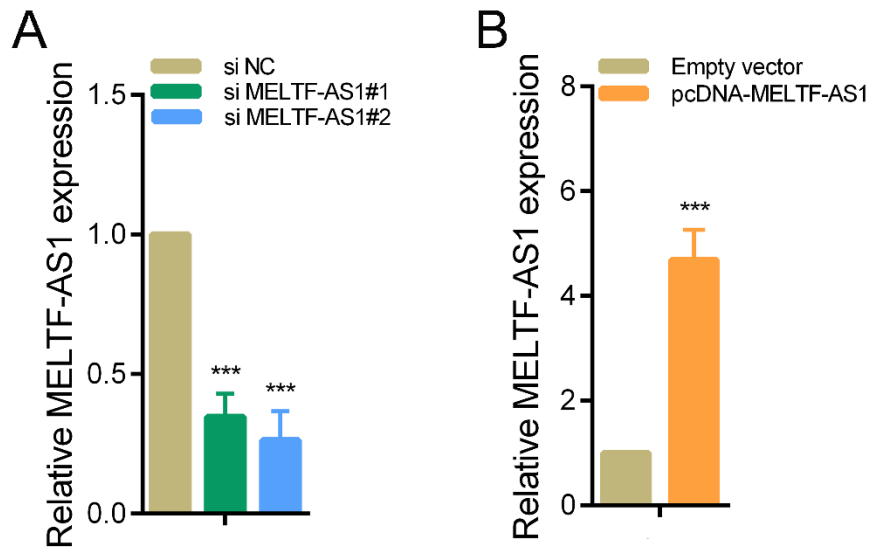

**Figure S2.** (A) QPCR analysis of MELTF-AS1 expression after knockdown of MELTF-AS1 in 143B cells. (B) QPCR analysis of MELTF-AS1 expression after overexpressing MELTF-AS1 in 143B cells. \*\*\*P < 0.001.

**Table S1:** The probability of each transcription factor binding to the MELTF-AS1 promoter region predicted by the JASPAR tool, the higher the score, the greater the probability.

| Transcription factor | Score  | Start | End  | Strand | predicted site sequence |
|----------------------|--------|-------|------|--------|-------------------------|
| RREB1                | 18.844 | 312   | 331  | -1     | CCCCACACCACCACCCCTCG    |
| Zfx                  | 16.178 | 1491  | 1504 | -1     | CCGGCCGGGGCCTC          |
| E2F3                 | 16.047 | 1977  | 1991 | 1      | CTCCCGCCCGCCCA          |
| PPARG::RXRA          | 16.039 | 548   | 562  | 1      | GTGGGGCAGGGGGCA         |
| TP63                 | 15.596 | 856   | 875  | 1      | CTGCATGTGCTGGCTTGTTT    |
| EGR2                 | 15.411 | 1721  | 1735 | -1     | CCCGCACCCACGCC          |
| Spi1                 | 15.367 | 1404  | 1418 | -1     | ATGAAGAGGAAGAGA         |
| Zfx                  | 15.141 | 1867  | 1880 | 1      | CCGGCTCGGCCTC           |
| EGR1                 | 15.113 | 1977  | 1990 | 1      | CTCCCGCCCGGCC           |
| SP2                  | 14.648 | 1522  | 1536 | -1     | TGCCCGCCCTCCGC          |
| EGR1                 | 14.636 | 413   | 426  | 1      | GGCCACCCACC             |
| ZNF263               | 14.560 | 1394  | 1414 | -1     | AGAGGAAGAGAAGAAATGGGA   |
| E2F3                 | 14.381 | 1973  | 1987 | 1      | CTCCCTCCCGCC            |
| Myod1                | 14.187 | 631   | 643  | -1     | TCCAGCTGCCTCC           |
| Nkx2-5 (var.2)       | 14.170 | 795   | 805  | -1     | AGGCACTCAA              |
| HSF1                 | 13.960 | 1437  | 1451 | 1      | GTTCTGAAACTTTT          |
| ZNF263               | 13.959 | 1400  | 1420 | -1     | AAATGAAGAGGAAGAGAAGAA   |
| E2F4                 | 13.950 | 1975  | 1985 | -1     | CGGCGGGAGGG             |
| RREB1                | 13.844 | 313   | 332  | -1     | CCCCACACCACCACCCCTC     |
| TP53                 | 13.843 | 849   | 863  | -1     | ACATGCAGAGGCTTG         |
| E2F6                 | 13.669 | 1876  | 1886 | -1     | GGGAGGGAGGC             |
| E2F6                 | 13.669 | 1971  | 1981 | -1     | GGGAGGGAGGC             |
| PRDM1                | 13.636 | 86    | 100  | -1     | TGAAAAGGAAAGTTA         |
| KLF5                 | 13.540 | 1915  | 1924 | 1      | CCCCACCCC               |
| Zfx                  | 13.392 | 1657  | 1670 | 1      | GAGCCCGGGCCTG           |
| STAT3                | 13.347 | 94    | 104  | -1     | CTTCTGAAAG              |
| STAT2::STAT1         | 13.336 | 86    | 100  | 1      | TAACCTTCTTTCCA          |
| Myog                 | 13.329 | 634   | 644  | 1      | GGCAGCTGGAA             |
| TEAD1                | 13.305 | 637   | 648  | -1     | CACATTCAGCT             |
| POU2F2               | 13.293 | 1337  | 1349 | -1     | GCCATTTGCATTC           |
| RFX2                 | 13.191 | 1196  | 1214 | 1      | GGTTGCATGGCTACAGCCG     |
| TP53                 | 13.147 | 858   | 872  | 1      | GCATGTGCTGGCTTG         |
| INSM1                | 13.033 | 551   | 562  | 1      | GGGCAGGGGGCA            |
| SP2                  | 13.021 | 413   | 427  | 1      | GGCCACCCACCT            |
| Tcf12                | 12.992 | 634   | 644  | 1      | GGCAGCTGGAA             |
| Zfx                  | 12.906 | 1962  | 1975 | 1      | CCCGTCCGGCCTC           |
| Bach1::Mafk          | 12.873 | 912   | 926  | 1      | GCACTGACACAGCAG         |
| Nfe2l2               | 12.862 | 911   | 925  | 1      | AGCACTGACACAGCA         |
| Spi1                 | 12.795 | 108   | 122  | 1      | AGGGTAGGGAAGTGG         |
| ZEB1                 | 12.786 | 1274  | 1282 | -1     | CCCCACCTG               |
| NR2C2                | 12.757 | 548   | 562  | 1      | GTGGGGCAGGGGGCA         |
| ZNF263               | 12.735 | 550   | 570  | 1      | GGGGCAGGGGGCAGCAGAGAA   |
| Erg                  | 12.604 | 1404  | 1414 | -1     | AGAGGAAGAGA             |
| EGR2                 | 12.599 | 1350  | 1364 | 1      | TCCGCGCCACGCGG          |
| Nr1h3::Rxra          | 12.591 | 75    | 93   | 1      | TGCCCAAAGGTTAACTTTC     |
| Tcf3                 | 12.445 | 148   | 158  | -1     | CTCAGCTGCAC             |
| ESR1                 | 12.424 | 1170  | 1189 | -1     | AGTCCCGGCACCTTCACCC     |
| SP1                  | 12.418 | 413   | 423  | 1      | GGCCACCCCC              |
| EGR2                 | 12.410 | 413   | 427  | 1      | GGCCACCCACCT            |
| INSM1                | 12.373 | 938   | 949  | -1     | TGTCAGGTGGCA            |
| EGR2                 | 12.343 | 966   | 980  | 1      | ACTGCACCCACGCAG         |
| STAT5                | 12.339 | 248   | 258  | -1     | TTTTCCATGAA             |

|                     |        |      |      |    |                       |
|---------------------|--------|------|------|----|-----------------------|
| <b>ZNF263</b>       | 12.296 | 1397 | 1417 | -1 | TGAAGAGGAAGAGAAGAAATG |
| <b>E2F6</b>         | 12.239 | 349  | 359  | 1  | GAGAGGGAAGC           |
| <b>Klf1</b>         | 12.225 | 980  | 990  | 1  | GGCCACACCTT           |
| <b>Zfx</b>          | 12.178 | 1139 | 1152 | -1 | AGGACCTGGGCCTC        |
| <b>KLF5</b>         | 12.124 | 477  | 486  | 1  | CCCACGCCCC            |
| <b>STAT3</b>        | 11.996 | 247  | 257  | 1  | CTTCATGGAAA           |
| <b>Sox3</b>         | 11.991 | 1120 | 1129 | -1 | GCTTTGTCCC            |
| <b>TLX1::NFIC</b>   | 11.937 | 1346 | 1359 | 1  | TGGCTCCGCGCCA         |
| <b>SP1</b>          | 11.891 | 1526 | 1536 | -1 | TGCCCGCCCTT           |
| <b>Tcf3</b>         | 11.821 | 633  | 643  | -1 | TCCAGCTGCCT           |
| <b>YY1</b>          | 11.821 | 1475 | 1486 | 1  | CAAGATGGAGTA          |
| <b>RUNX2</b>        | 11.813 | 433  | 447  | -1 | GTGCTCTGTGGTATC       |
| <b>RUNX1</b>        | 11.773 | 434  | 444  | -1 | CTCTGTGGTAT           |
| <b>RREB1</b>        | 11.722 | 315  | 334  | -1 | GGCCCCACACCACCCCC     |
| <b>EGR2</b>         | 11.693 | 1723 | 1737 | -1 | CGCCCCACCCACGC        |
| <b>Nfe2l2</b>       | 11.682 | 489  | 503  | 1  | TCCAGTGAGTTAGCA       |
| <b>SP1</b>          | 11.679 | 1915 | 1925 | 1  | CCCCACCCCG            |
| <b>Nr2e3</b>        | 11.665 | 1126 | 1132 | -1 | CAAGCTT               |
| <b>E2F1</b>         | 11.654 | 1706 | 1716 | -1 | CTGGCGGCAGC           |
| <b>SREBF2</b>       | 11.652 | 1167 | 1176 | 1  | GTGGGGTGAA            |
| <b>E2F6</b>         | 11.620 | 1975 | 1985 | -1 | CGGCGGGAGGG           |
| <b>Sox6</b>         | 11.606 | 1120 | 1129 | -1 | GCTTTGTCCC            |
| <b>Spi1</b>         | 11.597 | 1396 | 1410 | -1 | GAAGAGAAGAAATGG       |
| <b>TP63</b>         | 11.594 | 846  | 865  | -1 | GCACATGCAGAGGCTTGGAC  |
| <b>ELF1</b>         | 11.542 | 1405 | 1417 | -1 | TGAAGAGGAAGAG         |
| <b>EGR1</b>         | 11.525 | 1276 | 1289 | -1 | GGCTCGCCCCACC         |
| <b>Zfx</b>          | 11.509 | 1219 | 1232 | 1  | GCTGCCAGGCCTC         |
| <b>Klf4</b>         | 11.453 | 1915 | 1924 | -1 | GGGGTGGGGG            |
| <b>PLAG1</b>        | 11.434 | 63   | 76   | 1  | GAGGGGCTAGGGTG        |
| <b>RORA_2</b>       | 11.416 | 180  | 193  | 1  | ACAAAGTCGGTCAA        |
| <b>TP53</b>         | 11.401 | 859  | 873  | -1 | ACAAGCCAGCACATG       |
| <b>Tcfep2l1</b>     | 11.364 | 213  | 226  | -1 | CCAGTCAATTCCCTG       |
| <b>NFATC2</b>       | 11.360 | 252  | 258  | -1 | TTTTCCA               |
| <b>Tcfep2l1</b>     | 11.316 | 665  | 678  | 1  | CCTGCAAGAGCCAG        |
| <b>SP2</b>          | 11.286 | 1840 | 1854 | -1 | GCCCTGCCTCGTCCC       |
| <b>Ddit3::Cebpa</b> | 11.285 | 1194 | 1205 | -1 | CCATGCAACCCC          |
| <b>Nfe2l2</b>       | 11.279 | 138  | 152  | 1  | TGGAGTGACTGTGCA       |
| <b>NHLH1</b>        | 11.214 | 148  | 159  | -1 | TCTCAGCTGCAC          |
| <b>Klf4</b>         | 11.207 | 477  | 486  | -1 | GGGGCGTGGG            |
| <b>SREBF1</b>       | 11.106 | 1167 | 1176 | -1 | TTCACCCAC             |
| <b>Tcfep2l1</b>     | 11.099 | 1812 | 1825 | -1 | CCAGTCCATCCCG         |
| <b>ESR2</b>         | 11.073 | 1664 | 1678 | -1 | AGGTGACCCAGGCCG       |
| <b>Rfx1</b>         | 11.052 | 1196 | 1209 | 1  | GGTTGCATGGCTAC        |
| <b>Zfx</b>          | 11.052 | 1555 | 1568 | -1 | ACCCGCTGGGCCTG        |
| <b>EGR2</b>         | 11.024 | 1561 | 1575 | -1 | GCCCCGCACCCGCTG       |
| <b>USF2</b>         | 10.886 | 938  | 948  | -1 | GTCAGGTGGCA           |
| <b>EGR1</b>         | 10.878 | 1980 | 1993 | 1  | CCGCCGCCCCAGC         |
| <b>Myc</b>          | 10.867 | 858  | 867  | 1  | GCATGTGCTG            |
